# Supplementary material for: Drainage assessment of irrigation districts: on the precision and accuracy of four parsimonious models
Source: Copernicus journal article supplement (doi:10.5194/egusphere-2023-543), 2023-04-24
Supplement: Supplementary file [file egusphere-2023-543-AC1-supplement.pdf]

|                 | Irrigation obtained for AB1 calibration |                     |                            |                     | Irrigation obtained for AB2 calibration |                     |                            |                     | In situ irrigation (entire AB district) |                     |
|-----------------|-----------------------------------------|---------------------|----------------------------|---------------------|-----------------------------------------|---------------------|----------------------------|---------------------|-----------------------------------------|---------------------|
|                 | 2021                                    |                     | 2022                       |                     | 2021                                    |                     | 2022                       |                     | 2021                                    | 2022                |
|                 | RMSD (mm d <sup>-1</sup> )              | Average amount (mm) | RMSD (mm d <sup>-1</sup> ) | Average amount (mm) | RMSD (mm d <sup>-1</sup> )              | Average amount (mm) | RMSD (mm d <sup>-1</sup> ) | Average amount (mm) | Average amount (mm)                     | Average amount (mm) |
| SAMIR-Reservoir | 0.37                                    | 595                 | 0.69                       | 693                 | 0.34                                    | 621                 | 0.62                       | 719                 | 509                                     | 587                 |
| SAMIR-SIDRA     | 0.32                                    | 590                 | 0.65                       | 694                 | 0.38                                    | 617                 | 0.66                       | 720                 |                                         |                     |
